# Supplementary material for: Prostaglandin E receptor 4 (EP4) promotes colonic tumorigenesis
Source: PubMed Central journal article supplement (PMC4741781; doi:10.18632/oncotarget.5589), 2015-09-10
Supplement: oncotarget-06-33500-s001.pdf [file oncotarget-06-33500-s001.pdf]

# Prostaglandin E receptor 4 (EP4) promotes colonic tumorigenesis

## Supplementary Material

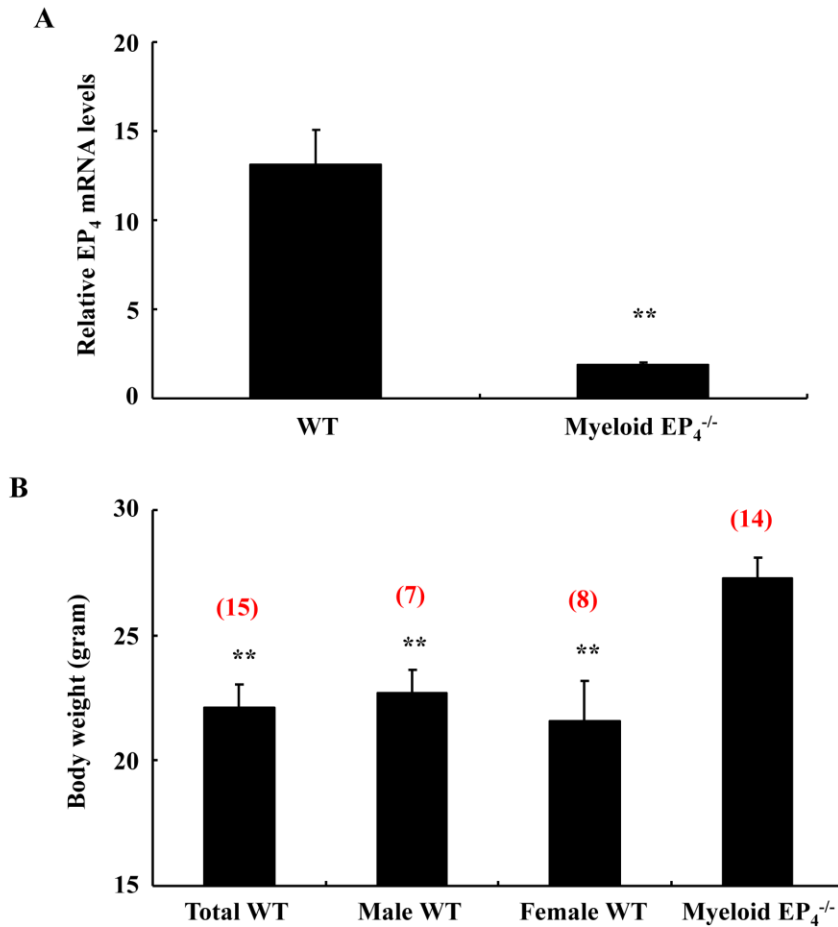

**Figure S1.** Deletion of myeloid cell EP<sub>4</sub> receptors was associated with higher body weight in *Apc*<sup>Min/+</sup> mice. **A:** EP<sub>4</sub> mRNA levels were markedly reduced in isolated intestinal myeloid cells in myeloid cell EP<sub>4</sub><sup>-/-</sup> *Apc*<sup>Min/+</sup> mice compared with wild type *Apc*<sup>Min/+</sup> mice (\*\*P < 0.01, n = 4). **B:** Body weight was significantly higher in myeloid cell EP<sub>4</sub><sup>-/-</sup> *Apc*<sup>Min/+</sup> mice than in male or female or total wild type *Apc*<sup>Min/+</sup> mice (\*\*P < 0.01). Animal number is indicated in the brackets.

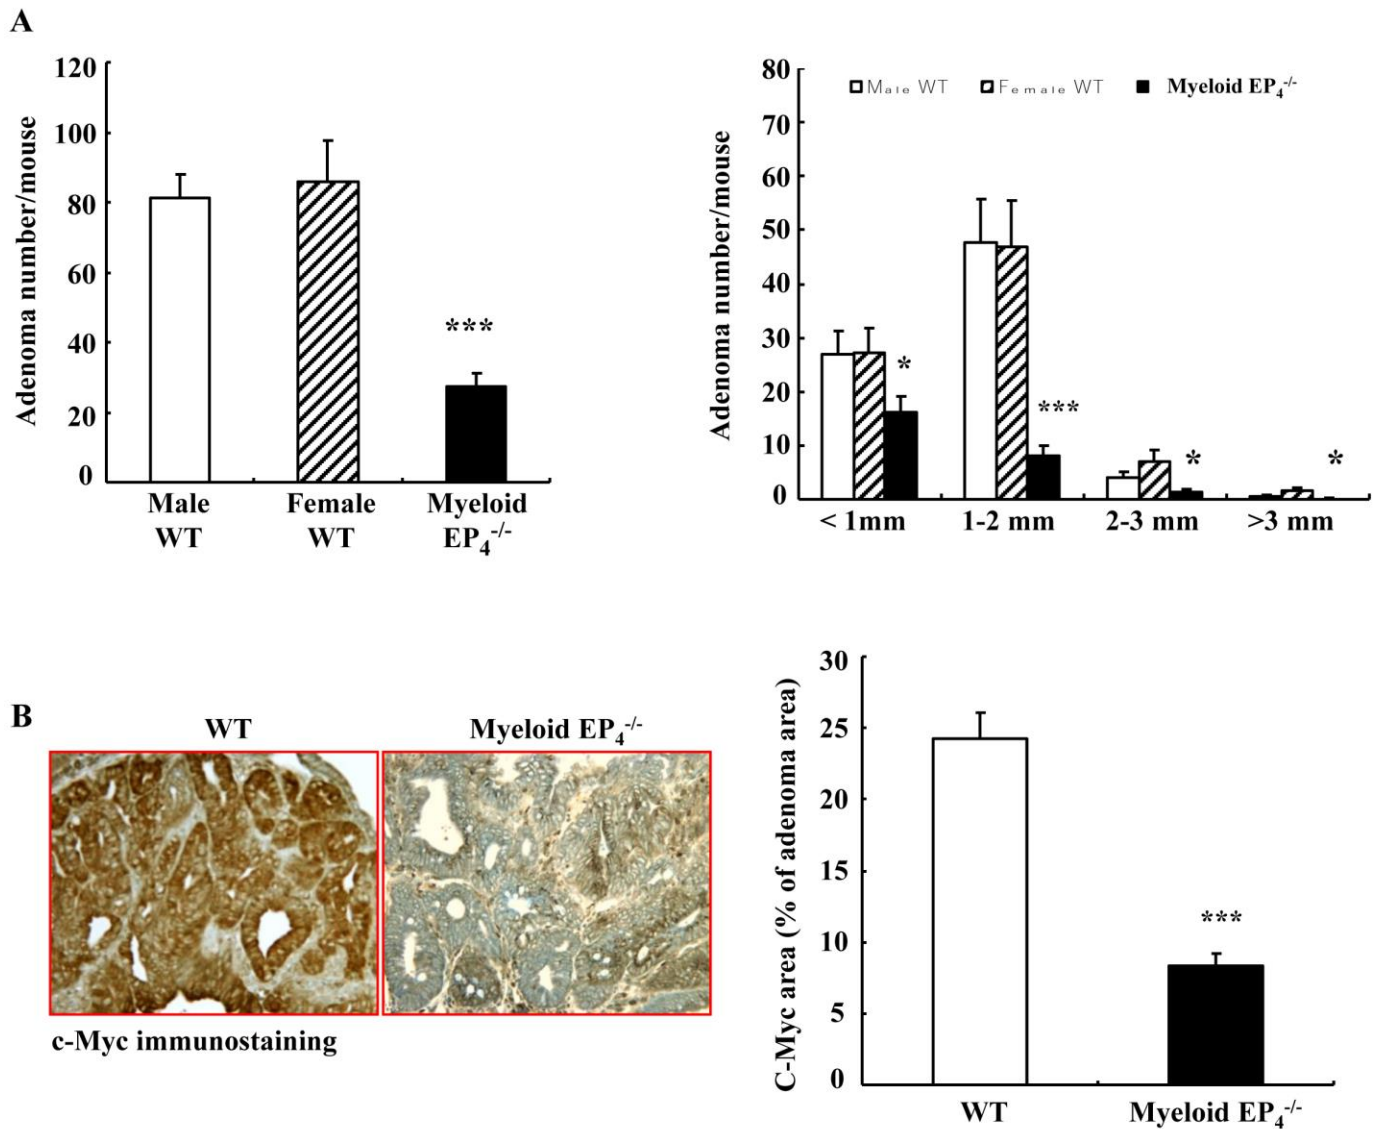

**Figure S2.** No gender difference was found in tumorigenesis in EP<sub>4</sub><sup>flx/flx</sup> (wild type) *Apc*<sup>Min/+</sup> mice. **A:** Both intestinal adenoma multiplicity and sizes were similar between male and female wild type *Apc*<sup>Min/+</sup> mice, but decreased in myeloid cell EP<sub>4</sub><sup>-/-</sup> *Apc*<sup>Min/+</sup> mice (\**P* < 0.05, \*\**P* < 0.01, \*\*\**P* < 0.001 vs. male or female WT, n = 7 in male WT group and n = 8 in female WT group). **B:** Immunostaining indicated that c-Myc was primarily expressed in nuclei and cytosol in adenoma epithelial cells and its expression decreased in myeloid cell EP<sub>4</sub><sup>-/-</sup> *Apc*<sup>Min/+</sup> mice (\*\*\**P* < 0.001, n = 4 in each group). Original magnification: x160.

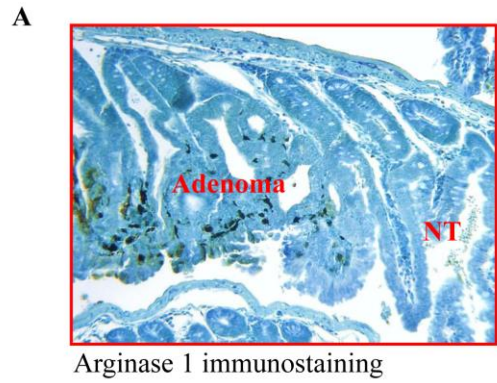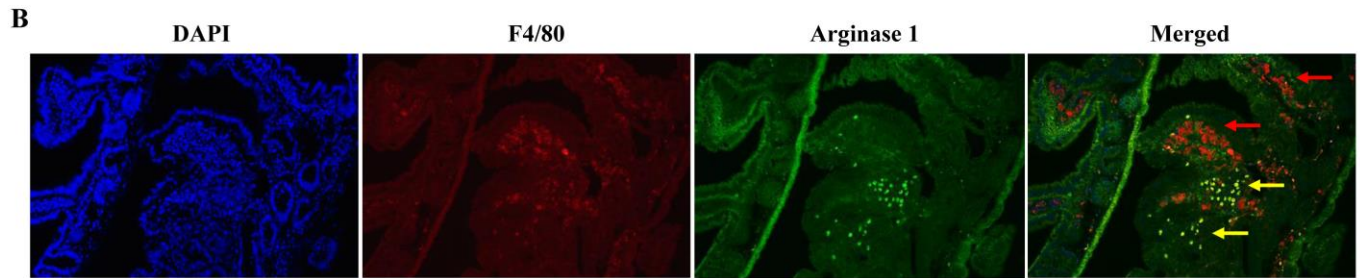

**Figure S3.** Macrophages/dendritic cells exhibited differential phenotypes in normal intestine and in adenoma in wild type *Apc*<sup>Min/+</sup> mice. **A:** Arginase 1, a commonly used marker of M2 macrophages/dendritic cells, was expressed in many tumor stromal cells but was not detected in normal intestine tissue (NT). **B:** Double fluorescent staining indicated that arginase 1 was expressed in most macrophages/dendritic cells (yellow arrows), but rarely expressed in macrophages/dendritic cells (red arrows) in adjacent normal intestinal tissue in wild type *Apc*<sup>Min/+</sup> mice. Original magnification: x 100 in all.

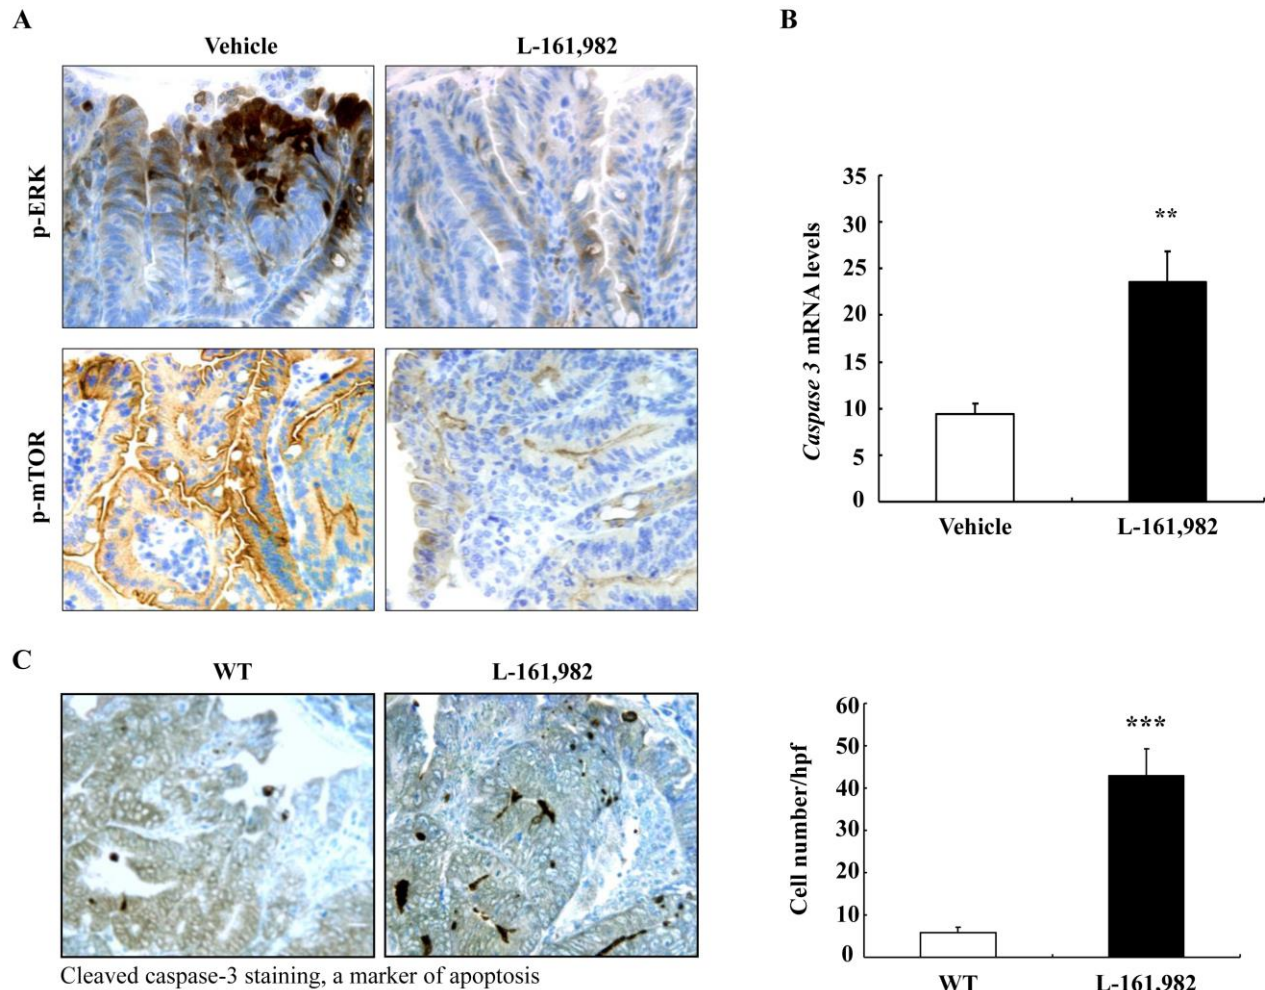

**Figure S4.** Pharmacologic inhibition of EP<sub>4</sub> receptors suppressed adenoma activities of the ERK and mTOR pathways and induced apoptosis. **A:** Treatment with L-161,982, a selective EP<sub>4</sub> receptor antagonist for a week led to decreased phosphorylation of ERK and mTOR. Original magnification: x160. **B:** L-161,982 treatment led to increased mRNA levels of caspase 3, indicating induction of apoptosis (\*\**P* < 0.01 vs. vehicle, *n* = 5). **C.** L-Treatment with 161,982 led to increases in adenoma apoptotic cells as indicated by cleaved caspase-1 staining (\*\**P* < 0.01 vs. vehicle, *n* = 4). Original magnification: x250.

Supplemental Table 1. Procedure for double fluorescent staining

| Antibody       | Blocking         | 1 <sup>st</sup> Ab Host | Detection                                            |
|----------------|------------------|-------------------------|------------------------------------------------------|
| COX-2          | 10% donkey serum | rabbit                  | Donkey anti-rabbit IgG-FITC                          |
| Arginase 1     | 10% donkey serum | goat                    | Donkey anti-goat IgG-FITC                            |
| IL-4R $\alpha$ | M.O.M kit        | mAb                     | Goat anti-mouse IgG-FITC                             |
| F4/80          | 10% goat serum   | rat                     | Biotin-goat anti-rat IgG plus Texas red streptavidin |

Note: M.O.M kit: for detecting mouse primary antibodies on mouse tissue peroxidase.
